# Supplementary material for: Polymorphisms in Genes Encoding Potential Mercury Transporters and Urine Mercury Concentrations in Populations Exposed to Mercury Vapor from Gold Mining
Source: PubMed Central journal article supplement (PMC3553430; doi:10.1289/ehp.1204951), 2012-10-09
Supplement: ehp.1204951.s001.pdf [file ehp.1204951.s001.pdf]

Supplemental Material

## **Polymorphisms in Genes Encoding Potential Mercury Transporters and Urine Mercury Concentrations in Populations Exposed to Mercury Vapor from Gold Mining**

Karin Engström<sup>1</sup>, Shegufta Ameer<sup>1</sup>, Ludovic Bernaudat<sup>2</sup>, Gustav Drasch<sup>3</sup>, Jennifer Baeuml<sup>4</sup>, Staffan Skerfving<sup>1</sup>, Stephan Bose-O'Reilly<sup>4,5</sup> Karin Broberg<sup>1</sup>

<sup>1</sup> Department of Laboratory Medicine, Division of Occupational and Environmental Medicine, Lund University, Lund, Sweden

<sup>2</sup> United Nations Industrial Development Organization, Vienna, Austria

<sup>3</sup> Institute of Forensic Medicine, Ludwig-Maximilians-University, Munich, Germany

<sup>4</sup> Institute of Public Health, Medical Decision Making and Health Technology Assessment, UMIT – University for Health Sciences, Medical Informatics and Technology, Hall i.T., Austria

<sup>5</sup> Institute and Outpatient Clinic for Occupational, Social and Environmental Medicine, University Hospital Munich, Munich, Germany

### **Table of contents**

Table S1. Pearson correlations ( $r$ ) between urinary mercury and potentially influential variables in the different study populations.

Table S2. Unadjusted geometric mean concentrations of mercury in urine ( $\mu\text{g/g}$  creatinine) and numbers of observations according to *MRP2* genotype by exposure subgroup, country and continent.

Table S3. Unadjusted geometric mean concentrations of mercury in urine ( $\mu\text{g/g}$  creatinine) according to *LAT1* rs33916661, *OAT1* 4149170 and *OAT3* 4149182 genotypes by exposure subgroup, country and continent.

Supplemental Material Table S1. Pearson correlations (*r*) between urinary mercury <sup>a</sup> and potentially influential variables in the different study populations.

| Country/<br>Continent | Correlation/<br>p-value | Exposure<br>group | Hg<br>storage | Age           | Gender <sup>b</sup> |
|-----------------------|-------------------------|-------------------|---------------|---------------|---------------------|
| Indonesia             | <i>r</i>                | <i>0.46</i>       | <i>0.33</i>   | <i>0.093</i>  | <i>0.22</i>         |
|                       | p                       | <0.001            | <0.001        | 0.090         | <0.001              |
| Philippines           | <i>r</i>                | <i>0.51</i>       | <i>0.53</i>   | <i>-0.12</i>  | <i>0.26</i>         |
|                       | p                       | <0.001            | <0.001        | 0.055         | <0.001              |
| Tanzania              | <i>r</i>                | <i>0.61</i>       | <i>0.52</i>   | <i>-0.077</i> | <i>0.37</i>         |
|                       | p                       | <0.001            | <0.001        | 0.25          | <0.001              |
| Zimbabwe              | <i>r</i>                | <i>0.85</i>       | <i>0.72</i>   | <i>-0.015</i> | <i>0.33</i>         |
|                       | p                       | <0.001            | <0.001        | 0.82          | <0.001              |
| Asia                  | <i>r</i>                | <i>0.50</i>       | <i>0.42</i>   | <i>-0.001</i> | <i>0.22</i>         |
|                       | p                       | <0.001            | <0.001        | 0.99          | <0.001              |
| Africa                | <i>r</i>                | <i>0.67</i>       | <i>0.63</i>   | <i>-0.13</i>  | <i>0.31</i>         |
|                       | p                       | <0.001            | <0.001        | 0.008         | <0.001              |

<sup>a</sup>Creatinine-adjusted, natural log- (ln-) transformed.

<sup>b</sup> Female=0, male=1.

Supplemental Material Table S2. Unadjusted geometric mean concentrations of urinary mercury ( $\mu\text{g/g}$  creatinine) and numbers of observations according to *MRP2* genotype by exposure subgroup<sup>a</sup>, country and continent.

| Country/<br>Continent | Indonesia             |           |           | Philippines  |           |           | Tanzania          |                    |              | Zimbabwe          |           |           | Asia      | Africa       |
|-----------------------|-----------------------|-----------|-----------|--------------|-----------|-----------|-------------------|--------------------|--------------|-------------------|-----------|-----------|-----------|--------------|
|                       | Low                   | High      | All       | Low          | High      | All       | Low               | High               | All          | Low               | High      | All       | All       | All          |
| <i>Genotype</i>       |                       |           |           |              |           |           |                   |                    |              |                   |           |           |           |              |
| <b>Rs1885301</b>      |                       |           |           |              |           |           |                   |                    |              |                   |           |           |           |              |
| AA                    | 4.9 (5)               | 7.1 (15)  | 6.4 (20)  | 0.94 (7)     | 16.5 (7)  | 3.9 (16)  | 0.47 (7)          | 2.2 (19)           | 0.92 (32)    | <sup>b</sup>      | 43.0 (18) | 16.5 (22) | 5.1 (36)  | 3.0 (55)     |
| GA                    | 3.4 (47)              | 7.3 (65)  | 4.9 (115) | 1.8 (34)     | 9.8 (29)  | 3.4 (78)  | 0.42 (27)         | 2.1 (63)           | 1.1 (101)    | 5.6 (17)          | 34.8 (65) | 7.8 (103) | 4.2 (194) | 2.9 (206)    |
| GG                    | 2.2 (54)              | 6.2 (119) | 3.6 (190) | 1.2 (71)     | 8.4 (55)  | 2.6 (148) | 0.37 (16)         | 1.8 (54)           | 0.89 (85)    | 4.6 (7)           | 21.9 (63) | 6.1 (90)  | 3.1 (339) | 2.4 (177)    |
| AA+AG                 | 3.5 (52)              | 7.2 (80)  | 5.1 (135) | 1.6 (41)     | 10.8 (36) | 3.4 (94)  | 0.37 (34)         | 2.2 (82)           | 1.0 (133)    | 5.6 (17)          | 36.4 (83) | 8.9 (125) | 4.4 (230) | 2.9 (261)    |
| GG                    | 2.2 (54)              | 6.2 (119) | 3.6 (190) | 1.2 (71)     | 8.4 (55)  | 2.6 (148) | 0.43 (16)         | 1.8 (54)           | 0.89 (85)    | 4.6 (7)           | 21.9 (63) | 6.1 (90)  | 3.1 (339) | 2.4 (177)    |
| <b>Rs717620</b>       |                       |           |           |              |           |           |                   |                    |              |                   |           |           |           |              |
| AA                    | 4.5(8)                | 2.5 (12)  | 2.9 (21)  | <sup>b</sup> | 16.2 (5)  | 5.8(9)    | (0)               | (1) <sup>c</sup>   | <sup>b</sup> | (0)               | (0)       | (0)       | 3.6 (30)  | <sup>b</sup> |
| GA                    | 3.1(42)               | 8.8 (54)  | 5.6 (89)  | 1.9 (23)     | 9.5 (22)  | 4.3 (49)  | (0)               | (2) <sup>c</sup>   | 2.0 (5)      | (0)               | 83 (5)    | 24.9 (6)  | 5.1 (138) | 4.8 (11)     |
| GG                    | 2.4(61)               | 6.5 (135) | 3.8 (213) | 1.1 (76)     | 9.7 (51)  | 2.5 (158) | (53) <sup>c</sup> | (131) <sup>c</sup> | 2.0 (214)    | (24) <sup>c</sup> | 28 (136)  | 7.0 (204) | 3.2 (373) | 2.6 (418)    |
| AA+GA                 | 3.3(42)               | 7.0 (66)  | 5.0 (110) | 1.9 (23)     | 10.5 (27) | 4.5 (58)  | (0)               | (3) <sup>c</sup>   | 2.0 (5)      | (0)               | 83 (5)    | 24.9 (6)  | 4.8 (168) | 4.8 (11)     |
| GG                    | 2.4 (61)              | 6.5 (135) | 3.8 (213) | 1.1 (76)     | 9.7 (51)  | 2.5 (158) | (53) <sup>c</sup> | (131) <sup>c</sup> | 2.0(214)     | (24) <sup>c</sup> | 28 (136)  | 7.0 (204) | 3.2 (373) | 2.6 (418)    |
| <b>Rs2273697</b>      |                       |           |           |              |           |           |                   |                    |              |                   |           |           |           |              |
| AA+GA <sup>d</sup>    | (2) <sup>c</sup>      | 11.2 (17) | 9.2 (19)  | 1.3 (19)     | 8.3 (22)  | 3.2 (46)  | 0.50 (24)         | 1.6 (46)           | 0.85 (80)    | 5.4 (7)           | 16.7 (46) | 7.3 (63)  | 3.5 (65)  | 2.2 (143)    |
| GG                    | 2.8(102) <sup>c</sup> | 6.3 (184) | 4.0 (306) | 1.3 (82)     | 10.7 (56) | 2.8 (172) | 0.36 (27)         | 2.4 (85)           | 1.0 (134)    | 5.3 (17)          | 37.4 (95) | 7.3 (147) | 4.4 (478) | 2.9 (281)    |

[Table S2 continued]

<sup>a</sup>Control subgroups are not shown separately, but are included in the “All” group.

<sup>b</sup>Denotes that the genotype is pooled with heterozygotes, due to a low number of individuals (3 or less).

<sup>c</sup>Data is not shown, due to a low number of individuals (3 or less) for all genotypes but one.

<sup>d</sup>Rs2273697 AA+AG genotypes were pooled in all populations due to a low number of individuals with AA genotype.

Supplemental Material Table S3. Unadjusted geometric mean concentrations of urinary mercury ( $\mu\text{g/g creatinine}$ )<sup>a</sup> according to *LATI* rs33916661, *OATI* 4149170 and *OAT3* 4149182 genotypes by exposure subgroup<sup>b</sup>, country and continent.

| Country/<br>Continent | Indonesia |           |           | Philippines  |              |           | Tanzania  |          |           | Zimbabwe     |           |           | Asia      | Africa    |
|-----------------------|-----------|-----------|-----------|--------------|--------------|-----------|-----------|----------|-----------|--------------|-----------|-----------|-----------|-----------|
|                       | Low       | High      | All       | Low          | High         | All       | Low       | High     | All       | Low          | High      | All       | All       | All       |
| <i>Genotype</i>       |           |           |           |              |              |           |           |          |           |              |           |           |           |           |
| <b><i>LATI</i></b>    |           |           |           |              |              |           |           |          |           |              |           |           |           |           |
| <b>Rs33916661</b>     |           |           |           |              |              |           |           |          |           |              |           |           |           |           |
| <i>GG</i>             | 3.4 (6)   | 8.1 (10)  | 5.8 (16)  | (0)          | 11.2 (4)     | 11.2 (4)  | 0.45 (5)  | 3.3 (18) | 1.8 (26)  | <sup>c</sup> | 35.1 (25) | 17.4 (31) | 6.6 (20)  | 6.2 (57)  |
| <i>GA</i>             | 2.5 (40)  | 5.3 (61)  | 3.6 (106) | 1.3 (33)     | 10.2 (30)    | 3.2 (177) | 0.35 (19) | 1.6 (59) | 0.81 (93) | 4.7 (10)     | 34.5 (62) | 8.9 (87)  | 3.4 (183) | 2.6 (181) |
| <i>AA</i>             | 2.9 (60)  | 7.1 (125) | 4.4 (199) | 1.4 (80)     | 9.3 (53)     | 2.7 (158) | 0.45 (28) | 2.0 (58) | 0.92(100) | 6.3 (13)     | 23.9 (58) | 5.5 (94)  | 3.6 (359) | 2.2 (198) |
| <b><i>OATI</i></b>    |           |           |           |              |              |           |           |          |           |              |           |           |           |           |
| <b>Rs4149170</b>      |           |           |           |              |              |           |           |          |           |              |           |           |           |           |
| <i>AA</i>             | 1.3 (7)   | 6.5 (9)   | 2.6 (18)  | <sup>c</sup> | <sup>c</sup> | 2.6 (4)   | 0.3 (16)  | 1.2 (25) | 0.59 (47) | 1.8 (4)      | 26.5 (37) | 6.7 (51)  | 2.6 (22)  | 2.1 (98)  |
| <i>GA</i>             | 2.4 (35)  | 6.1 (57)  | 4.1 (93)  | 1.1 (18)     | 9.0 (25)     | 3.5 (49)  | 0.3 (24)  | 2.6 (64) | 1.1 (102) | 7.4 (14)     | 33.0 (65) | 8.4 (100) | 3.9 (142) | 3.0 (207) |
| <i>GG</i>             | 3.3 (64)  | 6.7 (135) | 4.3 (215) | 1.4 (92)     | 9.7 (65)     | 2.9 (186) | 0.7 (12)  | 1.8 (48) | 1.1 (72)  | 5.1 (6)      | 28.0 (44) | 7.5 (64)  | 3.6 (203) | 2.7 (136) |
| <b><i>OAT3</i></b>    |           |           |           |              |              |           |           |          |           |              |           |           |           |           |
| <b>Rs4149182</b>      |           |           |           |              |              |           |           |          |           |              |           |           |           |           |
| <i>CC</i>             | 2.4 (8)   | 12.8 (10) | 5.0 (19)  | 1.7 (6)      | 9.5 (4)      | 3.0 (11)  | 0.33 (17) | 1.2 (25) | 0.58 (48) | 1.8 (4)      | 25.9 (39) | 7.0 (53)  | 4.2 (30)  | 2.1 (101) |
| <i>CG</i>             | 3.5 (42)  | 5.6 (64)  | 3.7 (116) | 1.0 (30)     | 6.8 (35)     | 2.7 (81)  | 0.34 (23) | 2.5 (66) | 1.1 (105) | 6.9 (14)     | 32.0 (64) | 8.1 (99)  | 3.2 (198) | 2.9 (209) |
| <i>GG</i>             | 2.4 (56)  | 6.9 (125) | 4.4 (190) | 1.4 (76)     | 11.4 (52)    | 3.1 (150) | 0.91 (11) | 1.9 (46) | 1.2 (67)  | 6.2 (6)      | 28.4 (43) | 7.5 (63)  | 3.7 (341) | 2.9 (230) |

<sup>a</sup>Numbers of individuals is within brackets.

<sup>b</sup>Control subgroups are not shown separately, but are included in the “All” group.

<sup>c</sup>Denotes that the genotype is pooled with the heterozygotes due to a low number of individuals (3 or less).
